# Supplementary material
Source: publisher site journal article supplement (https://www.dovepress.com/article/401231)
Supplement: Supplementary file 1 [file get_supplementary_file.php]

**Online Supplementary Content**

Search strategy

For each electronic database our search strategy was the following:

- Embase: this database was searched via STN; the search comprised the period between 1947 and 12 May 2022.

1. QUE (GINKGO OR MAIDENHAIR EXTRACT OR MAIDENHAIR TREE OR GBE OR EGB OR EGB761 OR GINGKO OR TANAKAN OR TEBONIN OR ROKAN OR PTEROPHYLLUS SALISBURIENSIS LEAF OR SALISBURIA ADIANTIFOLIA LEAF OR SALISBURIA BILOBA LEAF OR SALISBURIA MACROPHYLLA LEAF OR YINXINGYE OR GINKOBA )/TI,AB
2. QUE (MILD NEUROCOGNITIVE DISORDER? OR MCI OR AMCI OR MCIA OR NMCI OR MMCI OR ACMI OR ARCD OR SMC OR CIND OR BSF OR AAMI OR AACD OR MNCD OR BENIGN SEN? FORGETFULNESS OR PRECLINICAL AD OR PRE-CLINICAL AD OR PRECLINICAL ALZHEIMER? OR PRE-CLINICAL ALZHEIMER?)/TI,AB
3. QUE (MEMORY LOS? OR MEMORY DECLIN? OR MEMORY DISTURB? OR MEMORY DEFICIENC? OR MEMORY DEFICIT? OR MEMORY DETERIORAT? OR MEMORY DISORDER? OR MEMORY COMPLAIN? OR MEMORY IMPAIR? OR COGNIT? IMPAIR? OR COGNIT? DECLIN? OR COGNIT? DISORDER? OR COGNIT? DISTURB? OR COGNIT? DETERIORAT? )/TI,AB
4. QUE L2 OR L3
5. QUE L4 AND L1
6. QUE RANDOMIZED CONTROLLED TRIAL? OR CONTROLLED CLINICAL TRIAL?
7. QUE L5 AND L6
8. SEA FILE=MEDLINE L5 AND L6
9. SEA FILE=EMBASE L5 AND L6
10. SEA L7
11. DUP REM L10 (29 DUPLICATES REMOVED)
12. SOR L11 42-102 PY D

- Medline: this database was searched via OvidSP; the search comprised the period between 1946 and 06 May 2022.

1. "mild neurocognitive disorder".ab,ti.
2. ((cognit* or memory or cerebr* or mental*) adj3 (declin* or impair* or los* or deteriorat* or degenerat* or complain* or disturb* or disorder* or insufficient* or chronic)).ab,ti.
3. MCI.ab,ti.
4. (aMCI or MCIa or nMCI or mMCI).ab,ti.
5. (AMCI or ARCD or SMC or CIND or BSF or AAMI or AACD or MNCD).ab,ti.
6. "Benign senescent forgetfulness".ab,ti.
7. ((CDR adj2 "0.5") or ("clinical dementia rating" adj3 "0.5")).ab.
8. ("organic brain disease" or "organic brain syndrome").ab,ti.
9. "preclinical AD".ab,ti.
10. "pre-clinical AD".ab,ti.
11. "preclinical alzheimer*".ab,ti.
12. "pre-clinical alzheimer* ".ab,ti.
13. or/1-12
14. exp Ginkgo biloba/
15. ginkgo.ab,ti.
16. "maidenhair extract*".ab,ti.
17. "maidenhair tree*".ab,ti.
18. EGb.ab,ti.
19. GbE.ab,ti.
20. EGB761.ab,ti.
21. Tanakan.ab,ti.
22. Rokan.ab,ti.
23. Tebonin.ab,ti.
24. Ginkoba.ab,ti.
25. "Pterophyllus salisburiensis leaf".ab,ti.
26. "Salisburia adiantifolia leaf".ab,ti.
27. "Salisburia biloba leaf".ab,ti.
28. Yinxingye.ab,ti.
29. gingko.ab,ti.
30. or/14-29
31. randomized controlled trial.pt.
32. controlled clinical trial.pt.
33. randomized.ab.
34. placebo.ab.
35. drug therapy.fs.
36. randomly.ab.
37. trial.ab.
38. groups.ab.
39. or/31-38
40. exp animals/ not humans.sh.
41. 39 not 40
42. 41 and 30 and 13

- PubMed: this database was searched online at https://pubmed.ncbi.nlm.nih.gov/; the search comprised the period from the beginning until 06 May 2022.

Search query: (((((mild cogniti*[Title/Abstract]) OR (mild neurocog*[Title/Abstract])) OR ((“benign senescent forgetfulness”[Title/Abstract]) OR (“benign senile forgetfulness”[Title/Abstract]))) OR ((“clinical dementia rating 0 5”[Title/Abstract]) OR (“clinical dementia rating scale 0 5”[Title/Abstract]))) OR (((((“preclinical alzheimer”[Title/Abstract]) OR (“preclinical alzheimer disease”[Title/Abstract])) OR (“preclinical alzheimer s disease”[Title/Abstract]))) OR (“preclinical alzheimer s”[Title/Abstract]))) AND (((((((((((((((((“ginkgo biloba”[Title/Abstract]) OR (“ginkgo biloba 761”[Title/Abstract])) OR (“ginkgo biloba egb”[Title/Abstract])) OR (“ginkgo biloba egb 761”[Title/Abstract])) OR (“ginkgo biloba extract egb 761”[Title/Abstract])) OR (“ginkgo biloba extract gbe”[Title/Abstract])) OR (“ginkgo biloba extract”[Title/Abstract])) OR (“ginkgo biloba extract egb 761”[Title/Abstract])) OR (“ginkgo biloba extract egb”[Title/Abstract])) OR (“maidenhair extract”[Title/Abstract])) OR (“maidenhair tree” [Title/Abstract])) OR (“egb 761”[Title/Abstract])) OR (“gbe 761” [Title/Abstract])) OR (tebonin[Title/Abstract])) OR (tanakan[Title/Abstract])) OR (“rokan”[Title/Abstract])) OR (“ginkoba”[Title/Abstract]))
